# Supplementary material
Source: PubMed Central journal article supplement (PMC4572501)
Supplement: mmc1.pdf [file mmc1.pdf]

The American Journal of Human Genetics

Supplemental Data

## **Recurrent Mutations in the Basic Domain of *TWIST2* Cause Ablepharon Macrostomia and Barber-Say Syndromes**

Shannon Marchegiani, Taylor Davis, Federico Tessadori, Gijs van Haafden, Francesco Brancati, Alexander Hoischen, Haigen Huang, Elise Valkanas, Barbara Pusey, Denny Schanze, Hanka Venselaar, Anneke T. Vulto-van Silfhout, Lynne A. Wolfe, Cynthia J. Tifft, Patricia M. Zerfas, Giovanna Zambruno, Ariana Kariminejad, Farahnaz Sabbagh-Kermani, Janice Lee, Maria G. Tsokos, Chyi-Chia R. Lee, Victor Ferraz, Eduarda Morgana da Silva, Cathy A. Stevens, Nathalie Roche, Oliver Bartsch, Peter Farndon, Eva Bermejo-Sanchez, Brian P. Brooks, Valerie Maduro, Bruno Dallapiccola, Feliciano J. Ramos, Hon-Yin Brian Chung, Cédric Le Caignec, Fabiana Martins, Witold K. Jacyk, Laura Mazzanti, Han G. Brunner, Jeroen Bakkers, Shuo Lin, May Christine V. Malicdan, Cornelius F. Boerkoel, William A. Gahl, Bert B.A. de Vries, Mieke M. van Haelst, Martin Zenker, and Thomas C. Markello

# Supplementary Figures

## Figure S1

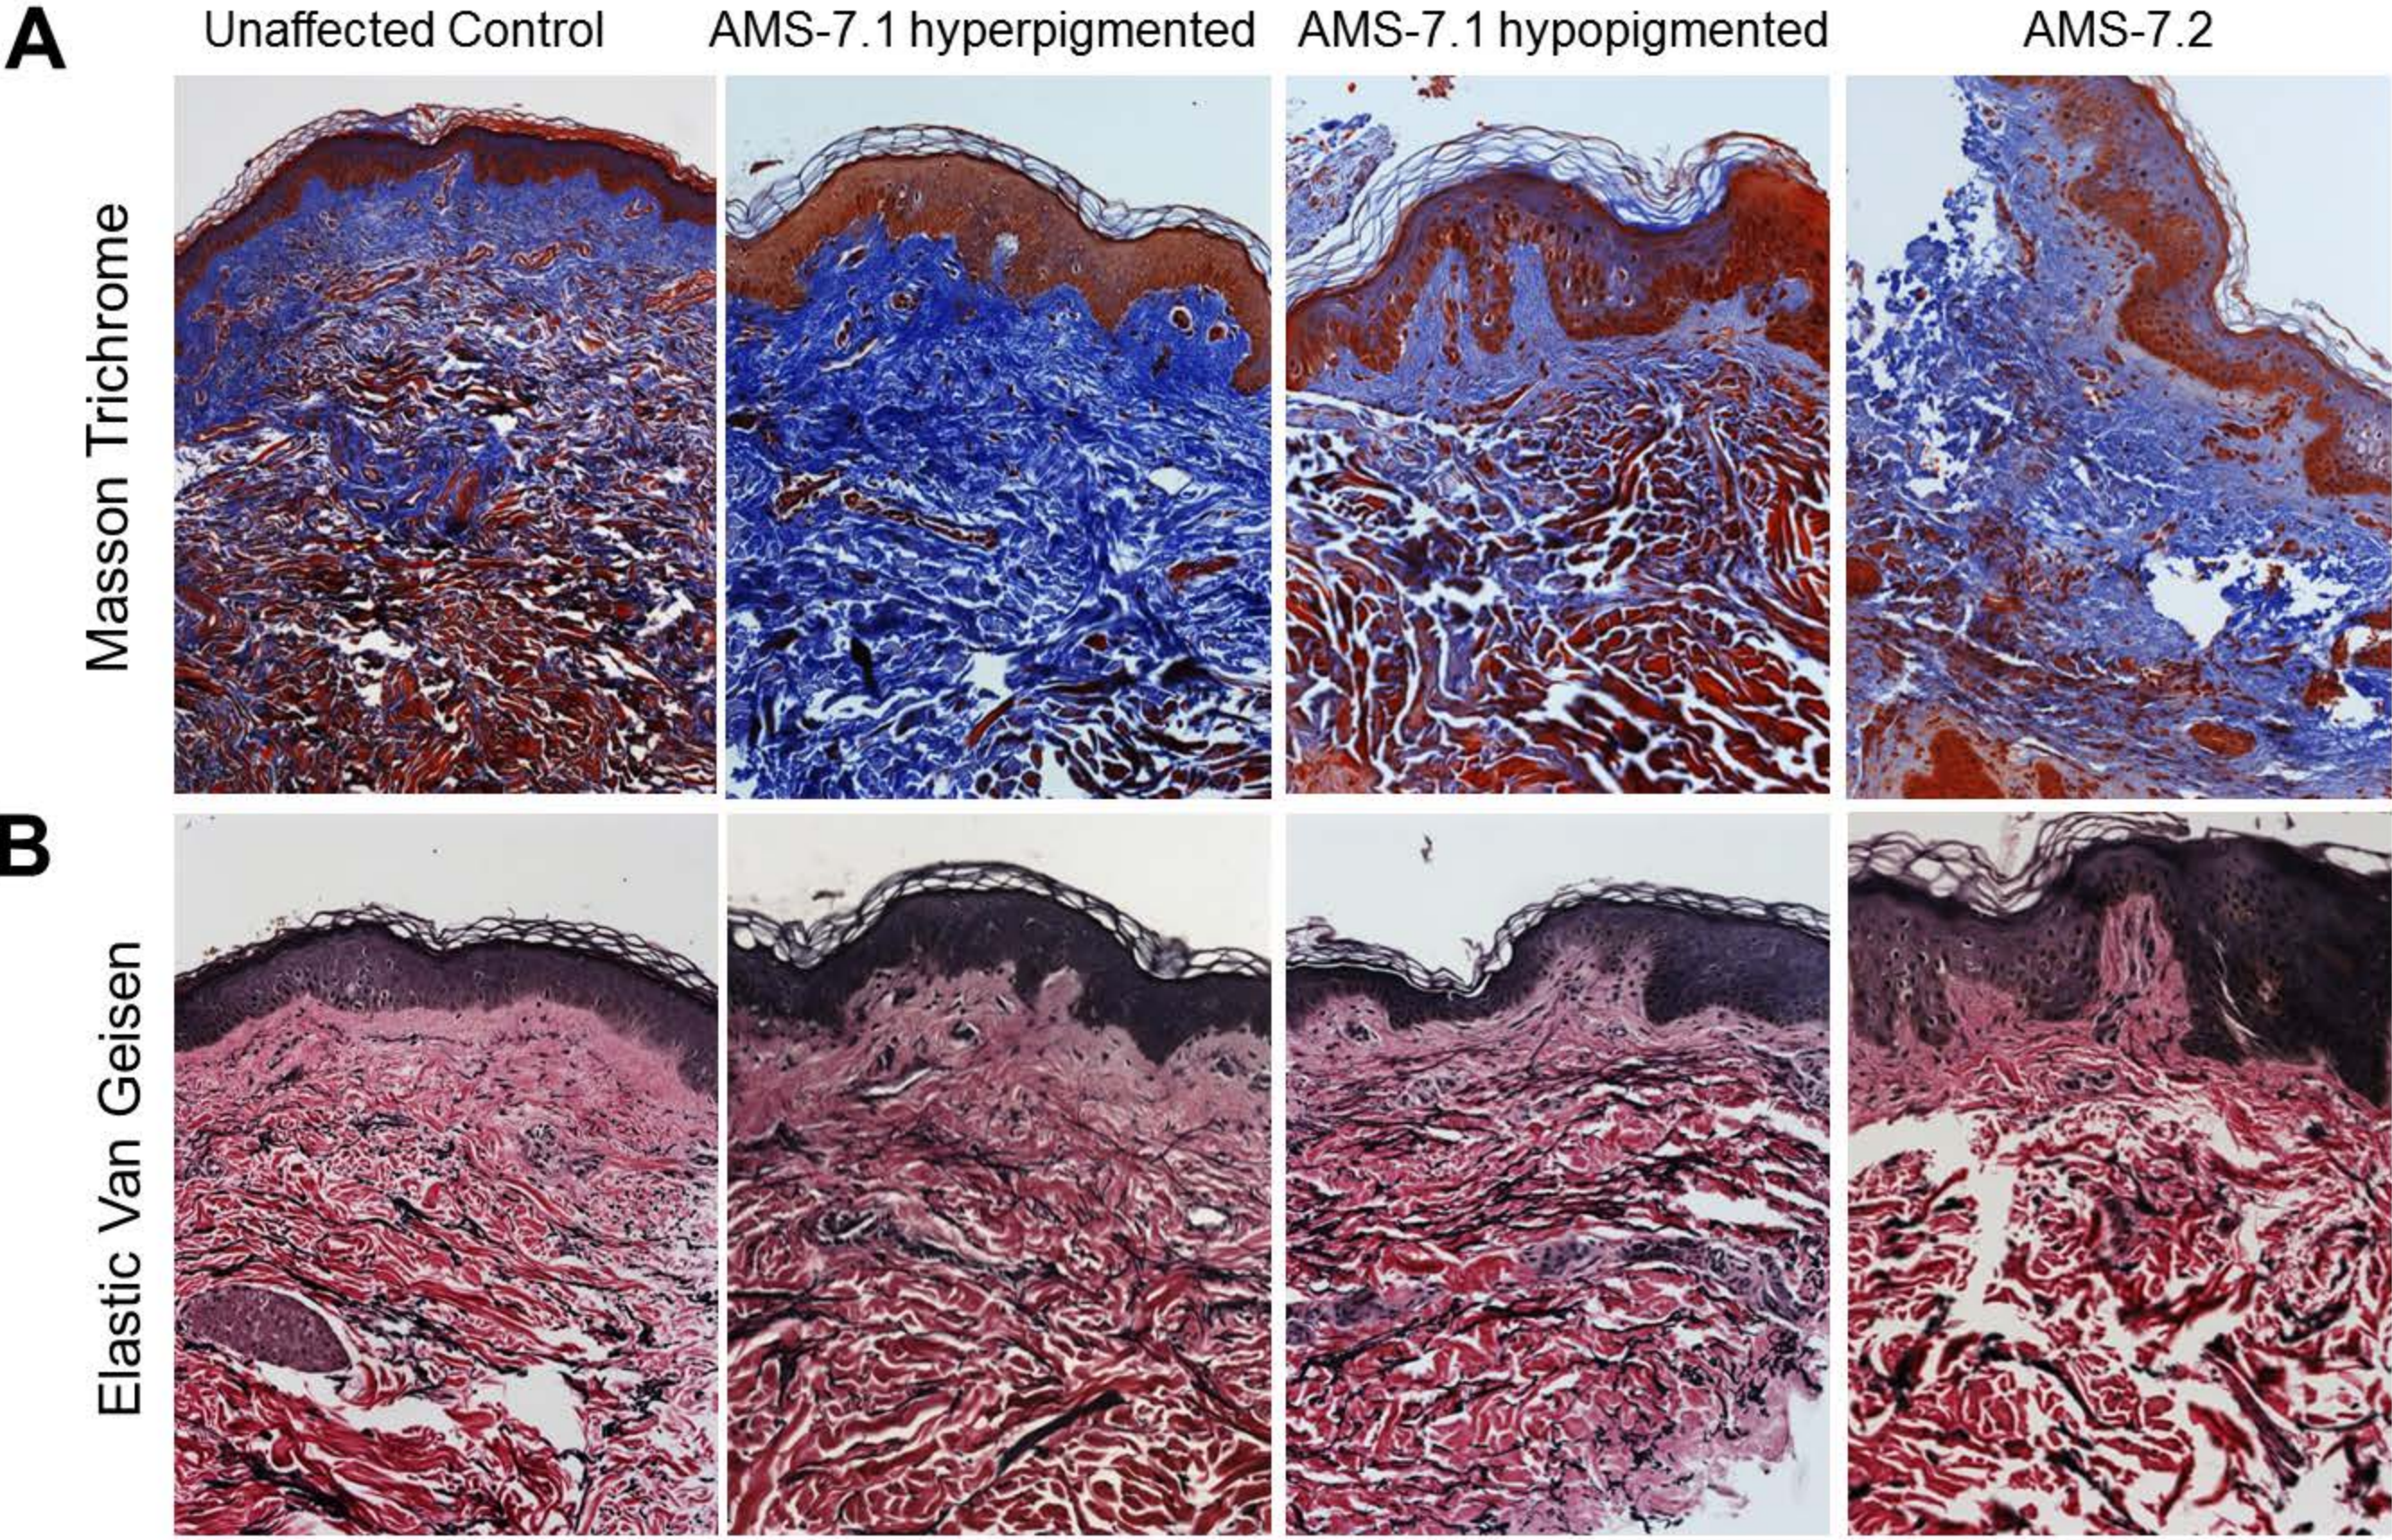

# Figures

## Figure S2

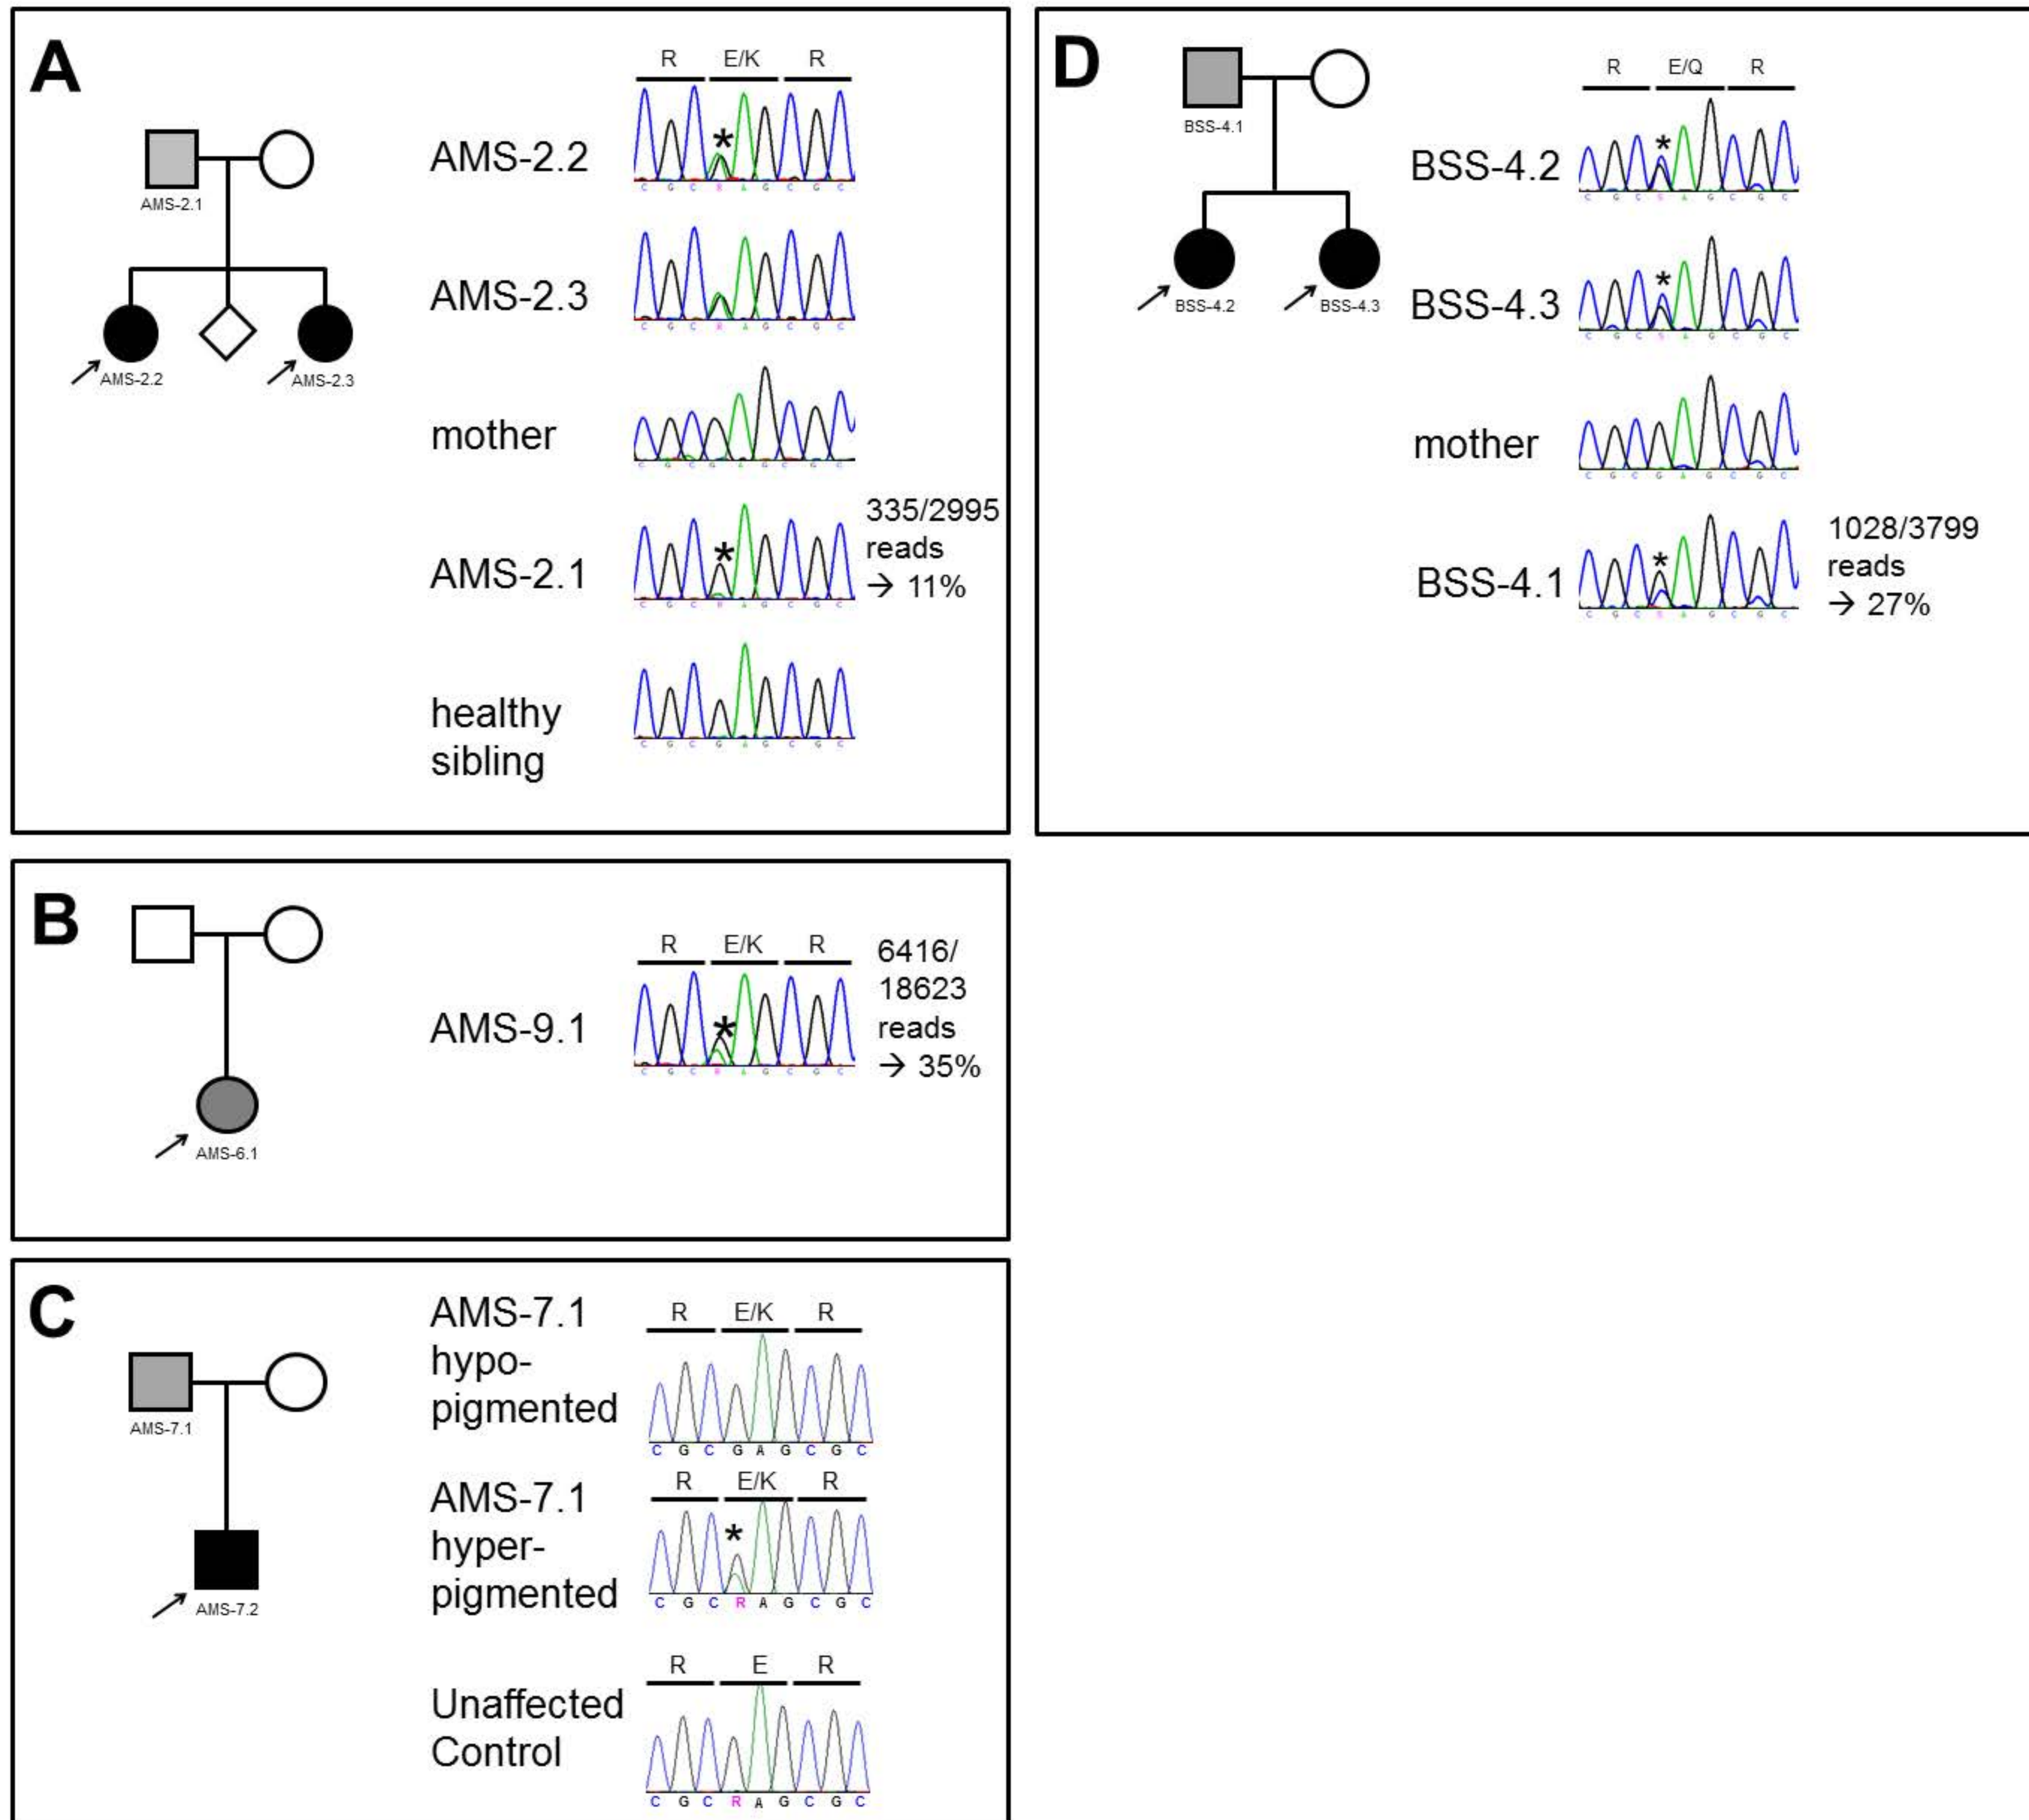

# Figure S3

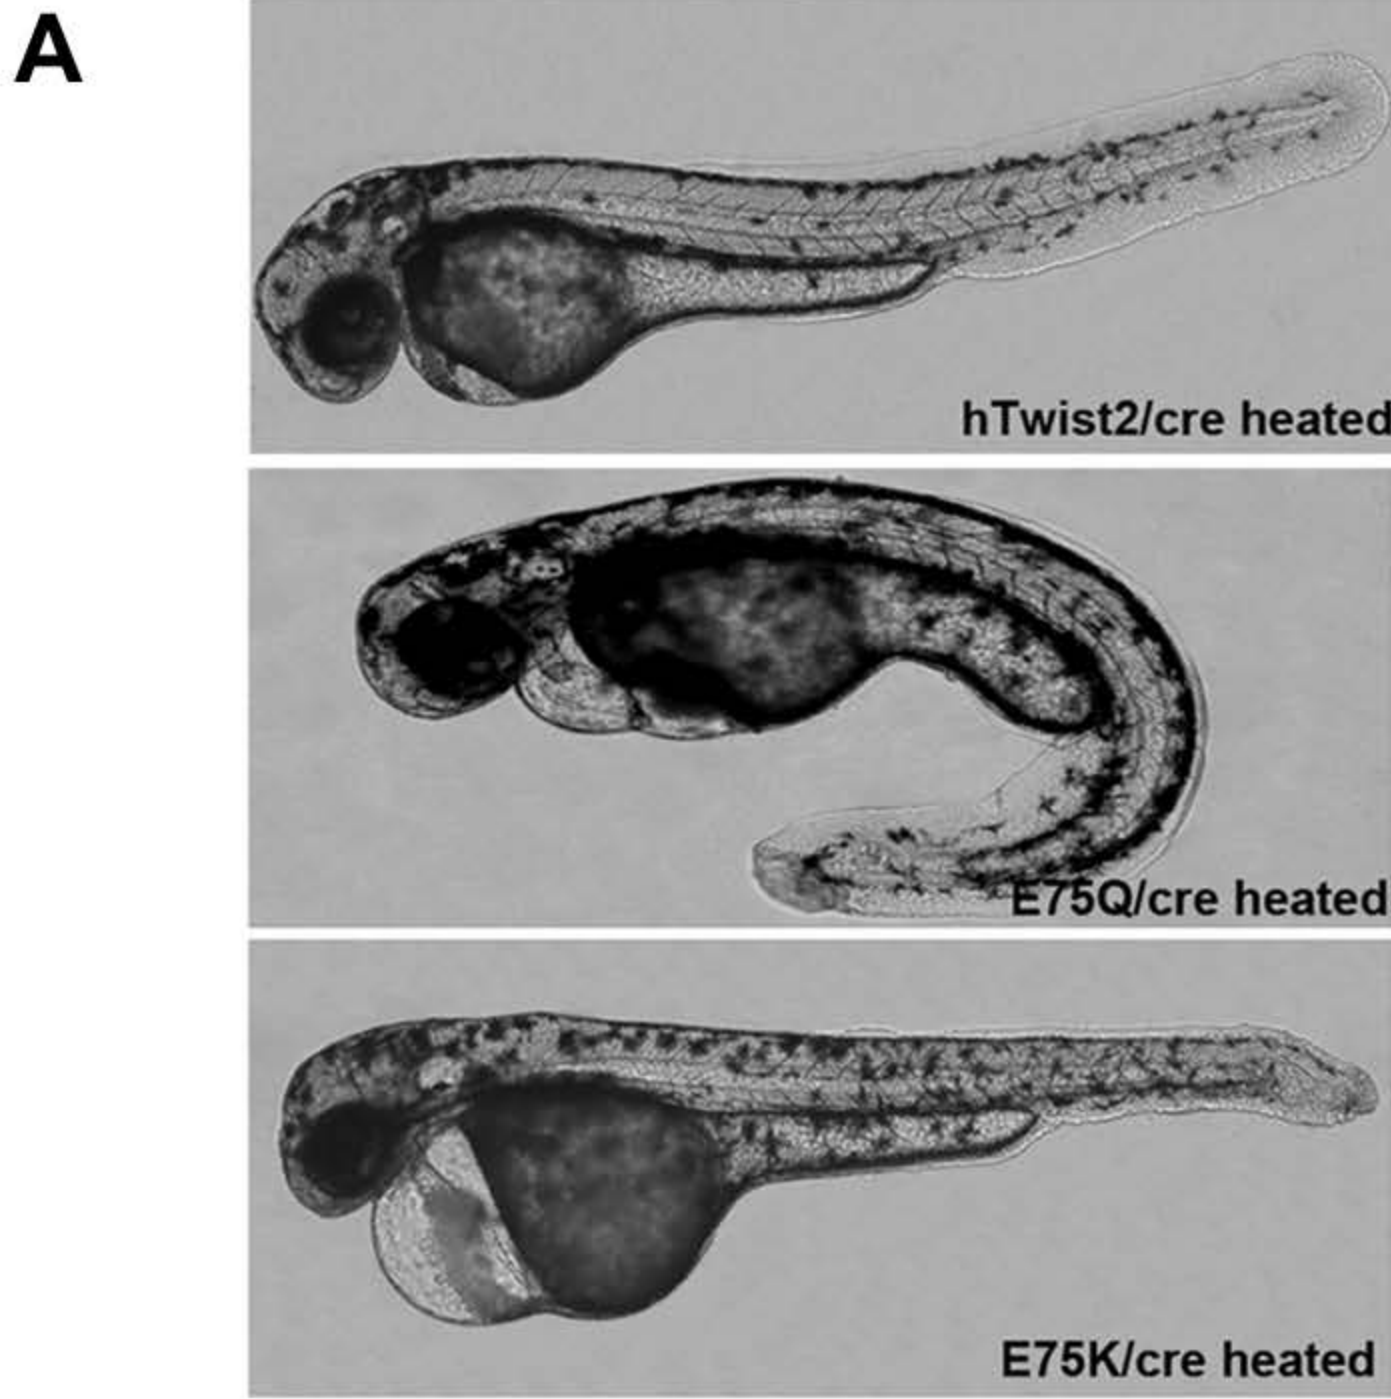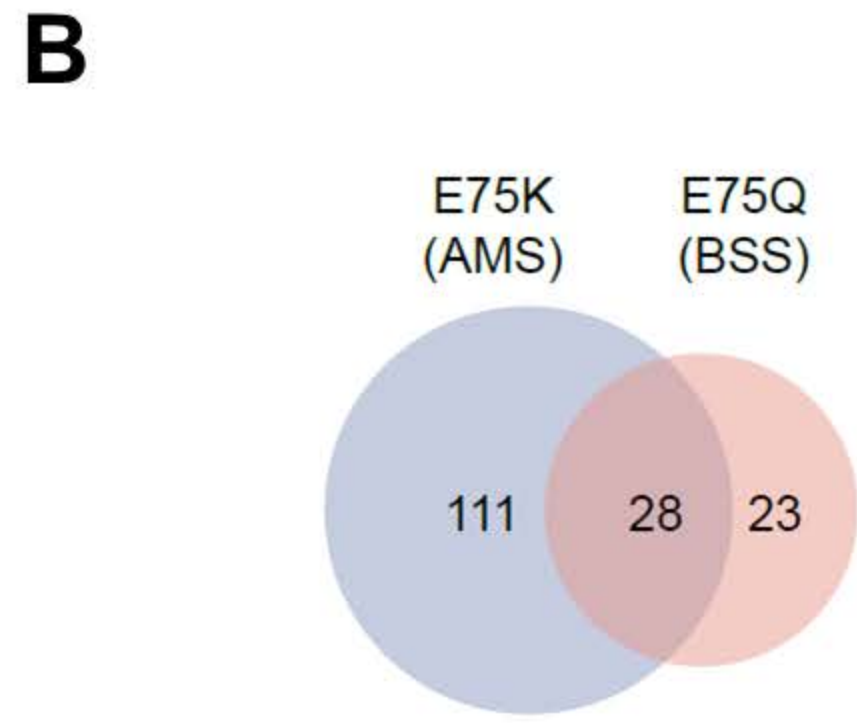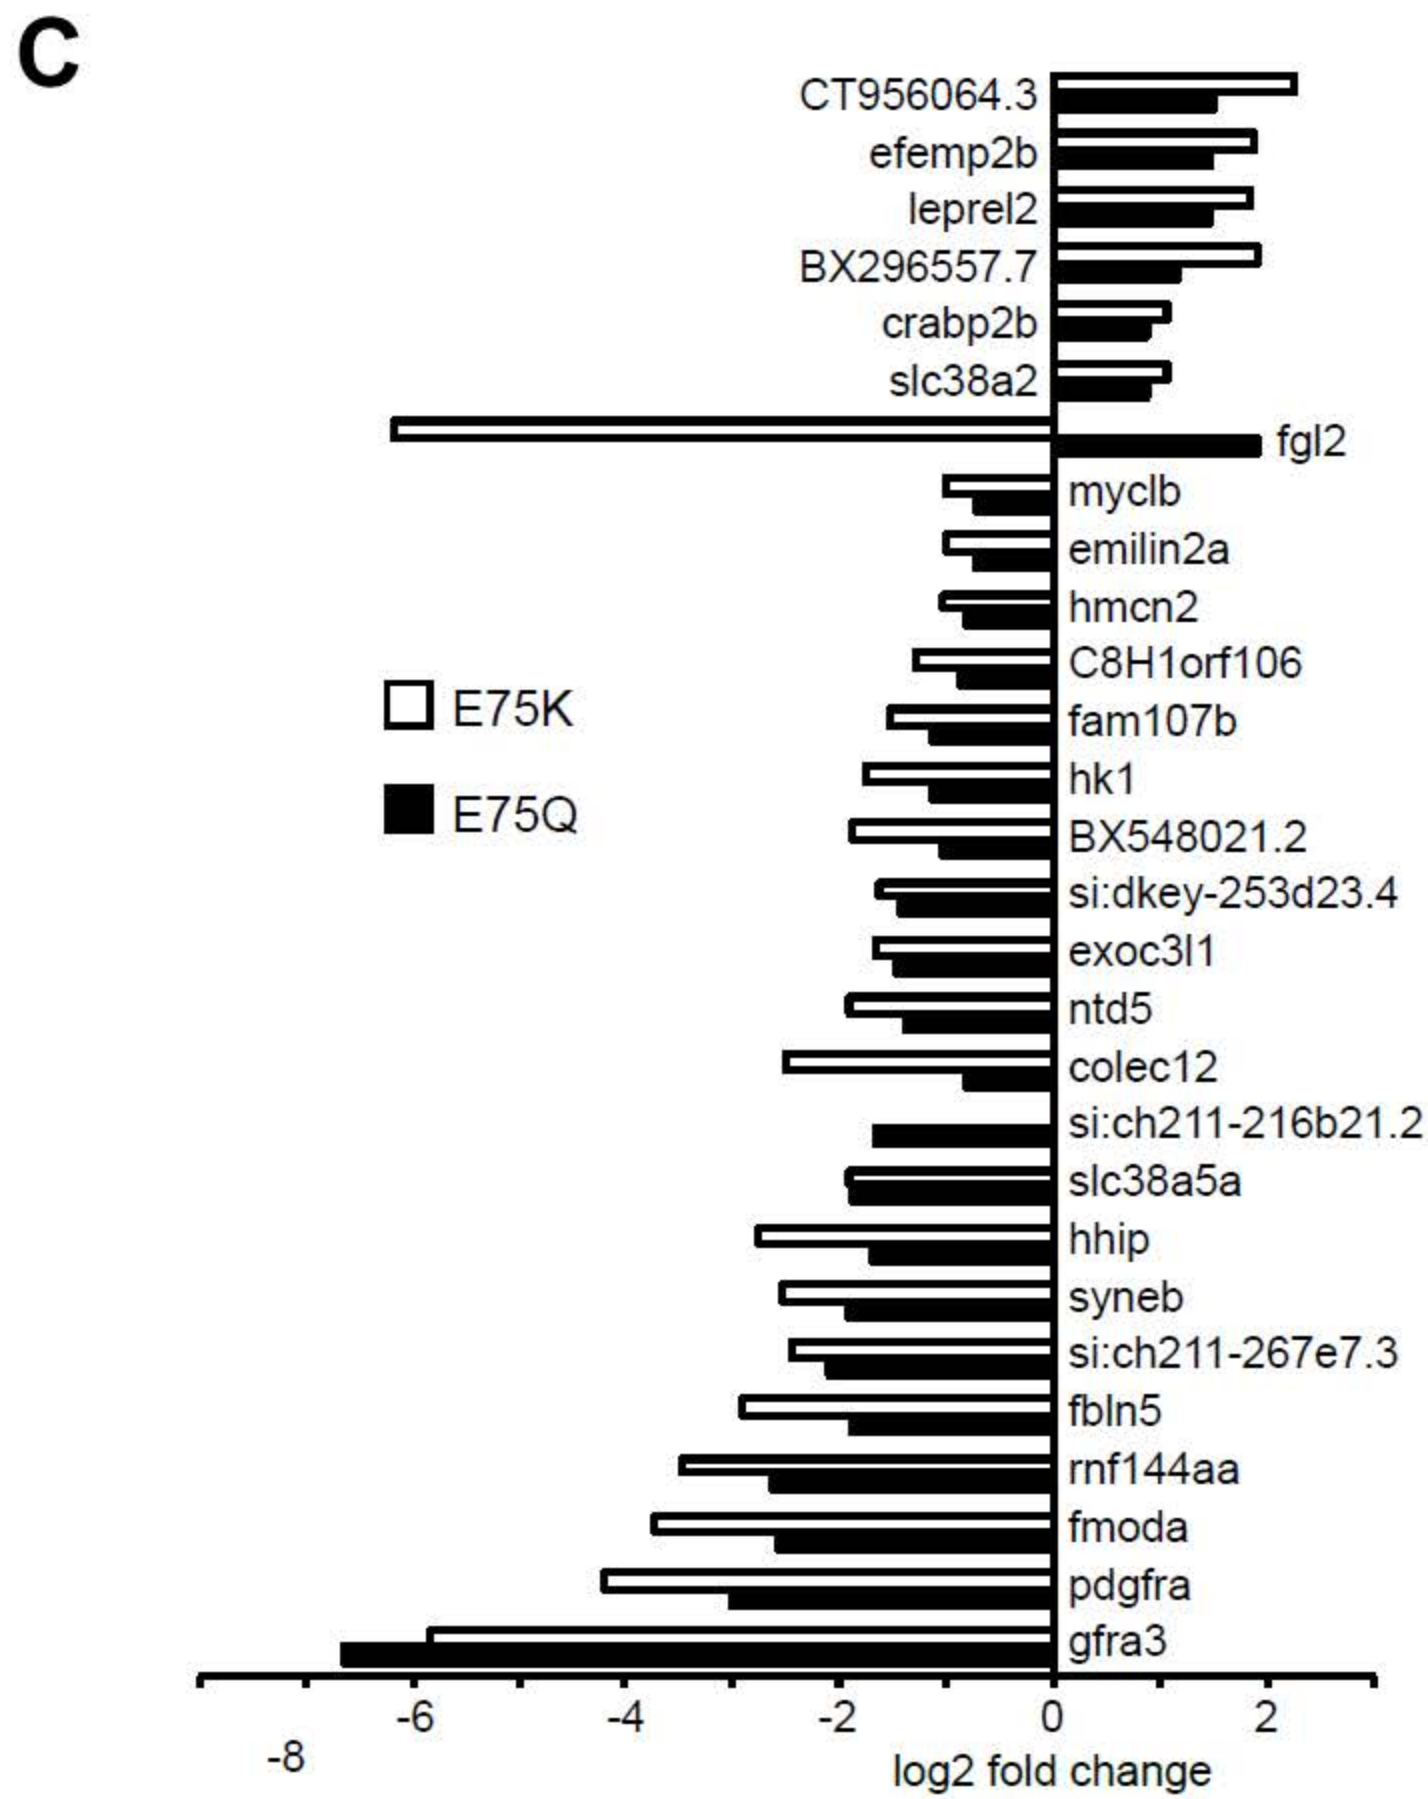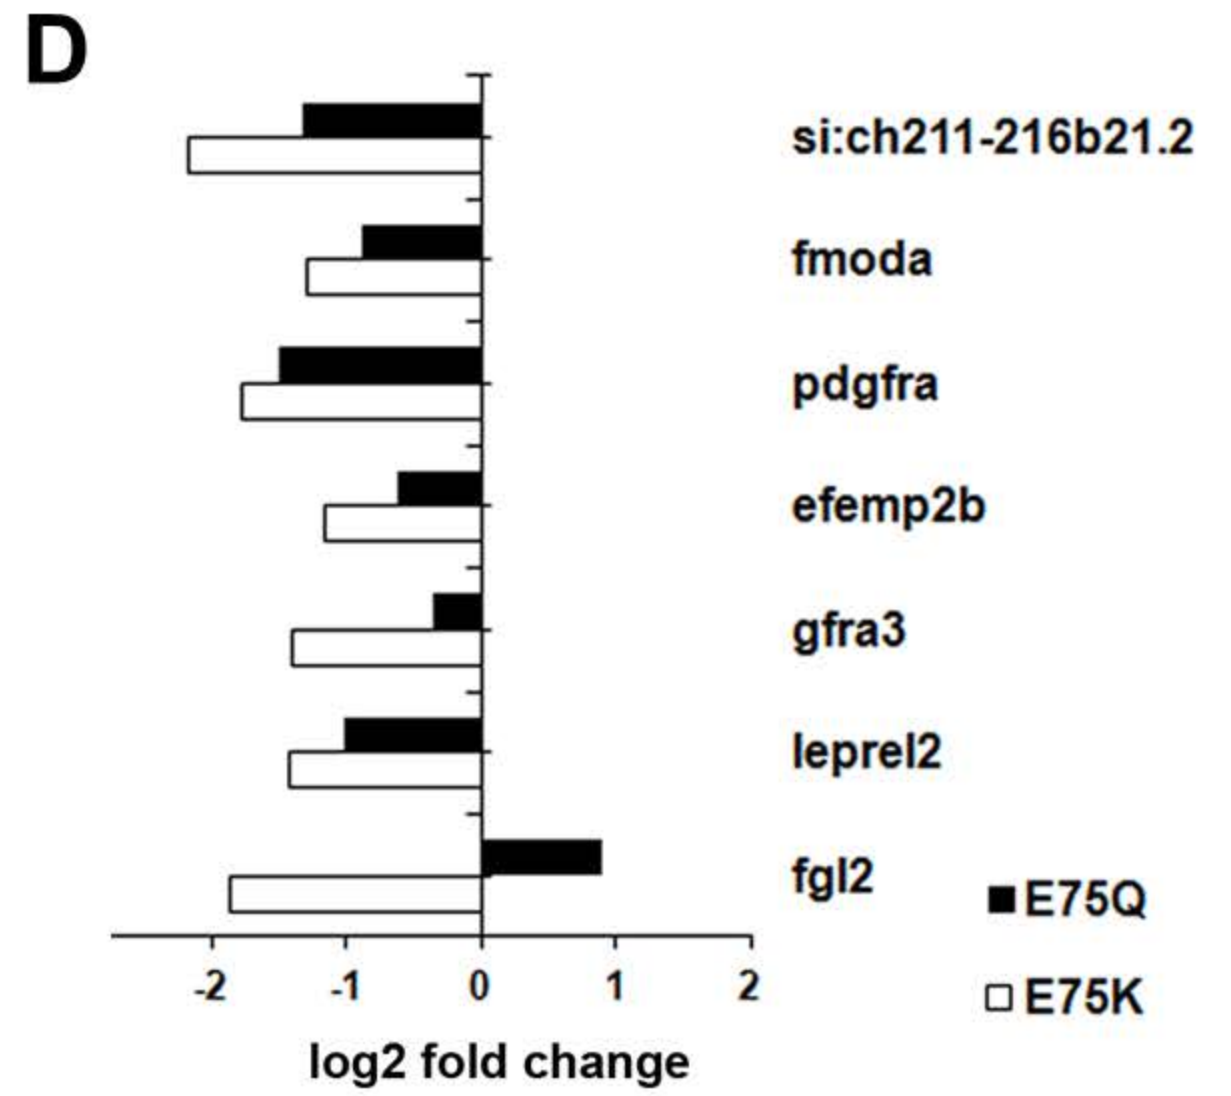

# Supplemental Data

## Supplemental Figure Legends

### Figure S1: Skin biopsies in AMS family 7.

Photomicrographs of full thickness Hematoxylin and Eosin staining of paraffin embedded skin from an unaffected control, AMS-7.1 hyperpigmented (affected) and hypopigmented (unaffected) areas, and AMS-7.2. The tissue was stained with Masson trichrome to demonstrate collagen fibers (blue) or Elastic Tissue Fibers – Verhoeff's Van Gieson (EVG) stains to show elastic fibers (black), which are prominent in the reticular dermis.

### Figure S2: Chromatograms showing mosaicism of AMS and BSS families

**a**, **b**, and **d** were confirmed by next generation sequencing on a Roche GS Junior. **c** results were confirmed by sequencing DNA extracted from dermal fibroblasts derived from hypopigmented (unaffected) and hyperpigmented (affected) skin. Asterisk highlights the mutation.

### Figure S3: Zebrafish

**a.** Defective morphology was observed in all transgenic embryos induced by *Cre* at 2 dpf but mutant p.Glu75Lys (E75K) and p.Glu75Gln (E75Q) embryos displayed stronger phenotype compared to the wild type TWIST2.

**b.** Venn diagram analysis of differentially-expressed genes in the *hTWIST2* p.Glu75Lys (E75K) and p.Glu75Gln (E75Q) overexpression libraries.

**c.** Cut-off for selection of genes:  $p_{adj} < 0.05$ . The 28 overlapping genes are listed with the level of up-regulation or down-regulation relative to wild-type *hTWIST2*-overexpressing samples. Data were collected from 3 biologically and technically independent experiments.

**d.** Seven target genes were chosen from RNA-Seq results for qPCR validation using transgenic lines. Compared to the wild type, p.Glu75Lys (E75K) appeared to be more potent than p.Glu75Gln (E75Q) in suppressing targeted genes. It is worth noting that *fgl2*

was enhanced in p.Glu75Gln (E75Q) but repressed by p.Glu75Lys (E75K), suggesting some difference between the two mutations in inducing the disease.

## Supplemental Table

**TABLE S1. Primers used for sequencing cloning, and zebrafish experiments**

| Primer Name              | Primer Sequence                                                                                     |
|--------------------------|-----------------------------------------------------------------------------------------------------|
| TWIST2_FLAG_HA_GC_F1     | CACCATGGACTACAAGGACGACGATGACAAAAGTCAAG<br>TCTACCCATACGATGTTCCAGATTACGCTGCTGCTATG<br>GAGGAGGGCTCCAGC |
| FLAG_HA_mutagenesisfix_F | GATGACAAAAGTCAAGCTCTACCCATACGATG                                                                    |
| FLAG_HA_mutagenesisfix_R | CATCGTATGGGTAGAGCTTGACTTTGTTCATC                                                                    |
| TWIST2GATERSTOP          | CTAGTGGGAGGCGGACAT                                                                                  |
| TWIST2SangerSequencingF  | CAGAGCCTTTCCAGCAACTC                                                                                |
| TWIST2SangerSequencingR  | AGCGTGGGGATGATCTTG                                                                                  |
| TWIST2_E75Q_mutF         | GCGCTGGCGCTGGCGCACGTTGG                                                                             |
| TWIST2_E75Q_mutR         | CCAACGTGCGCCAGCGCCAGCGC                                                                             |
| TWIST2_E75A_mutF         | TGCGCTGGCGCGCGCGCACGTTG                                                                             |
| TWIST2_E75A_mutR         | CAACGTGCGCGCGCGCCAGCGCA                                                                             |
| TWIST2_R77_Q78dup_mutF   | CGTGCGCGAGCGCCAGCGCCAGCGCACCCAGTCGCTC                                                               |
| TWIST2_R77_Q78dup_mutR   | GAGCGACTGGGTGCGCTGGCGCTGGCGCTCGCGCACG                                                               |
| TWIST2_E75K_mutF         | CAACGTGCGCAAGCGCCAGCG                                                                               |
| TWIST2_E75K_mutR         | CGCTGGCGCTTGCGCACGTTG                                                                               |
| fg12_F                   | TGGTCAATAAAATCAGCAGCAC                                                                              |
| fg12_R                   | CCTCTGAGTCTTCCAGCTCAAT                                                                              |
| efemp2_F                 | GGTGGTTACCTGTGTCTTCCTC                                                                              |
| efemp2_R                 | CCTGGTTCACACTCACAAGAGA                                                                              |
| leprel2_F                | CAGGCAGTGGATTATCATCAGA                                                                              |
| leprel2_R                | AGACACTTCGACTCATGCAGAA                                                                              |
| gfra3_F                  | CTGTTTAGAGGCTCTCCAGGAA                                                                              |
| gfra3_R                  | AAACTATGGAGGCCAGTTTTGA                                                                              |
| pdgfra_F                 | GACGTTCTGAGGTTGTAGACC                                                                               |
| pdgfra_R                 | AATGAGCTCTCGTGAAGTGTGA                                                                              |
| fmoda_F                  | GGCCAATCAGATCAAAGAGTTC                                                                              |
| fmoda_R                  | GATAAAACAAATTGGCTGCACA                                                                              |
| si:ch211-216b21.2_F      | CAGATAAGCGCATGTTTCTGTC                                                                              |
| si:ch211-216b21.2_R      | GGAGCTTCTCGAGTGACAAAAGT                                                                             |

## **Supplemental Methods**

### **Histology**

Skin biopsy specimens were fixed in 10% neutral buffered formalin, routinely processed, and embedded in paraffin. After deparaffinization of 4-5  $\mu\text{m}$  sections, the slides were subjected to a series of rehydration steps. Slides were stained with Masson Trichrome and Elastic Tissue Fibers - Verhoeff's Van Gieson (EVG) stains following standard protocols.

### **Zebrafish**

Stable transgenic zebrafish lines expressing human wild type and mutant human *TWIST2* (p.Glu75Lys and p.Glu75Gln) under the control of a Cre-loxP inducible system were generated using a Tol2 based transgenic technology. Wild type or mutant *TWIST2* cDNA were placed downstream of zebrafish  $\beta$ -actin promoter, in which mCherry-STOP signal with two loxP elements at the both ends was placed between *TWIST2* gene sequence and  $\beta$ -actin promoter. Upon introduction of Cre, the mCherry-STOP cassette will be removed, functioning as an inducible element. Phenotypes of transgenic embryos were analyzed upon induction of Cre by heat at 38.5°C for 30 minutes at 24hpf using heat-shock hs-Cre (+/-) and Twist2 (+/-) double transgenic zebrafish embryos. For qPCR, 60 transgenic embryos were heated at 38.5°C for 30 minutes at 80% epiboly stage and then collected for RNA preparation in Trizol three hours later.
